# Supplementary material for: A new approach to the synthesis of conjugated polymer–nanocrystal composites for heterojunction optoelectronics
Source: Royal Society of Chemistry journal article supplement (doi:10.1039/b406060a), 2004-01-01
Supplement: b406060a.pdf [file b406060a.pdf]

# Supplementary Material (ESI) for Chemical Communications  
# This journal is © The Royal Society of Chemistry 2004

Examining the lifetime of the MEH-PPV fluorescence at 560nm (pumped at 410nm – see 580nm (figure below) we find that the composite materials lifetime is less than that of pure polymer. This strongly suggests that longer lived MEH-PPV excited states are quenched by the nanocrystal. At this stage we cannot say whether the process involves exciton (Forster) or individual charge transfer.

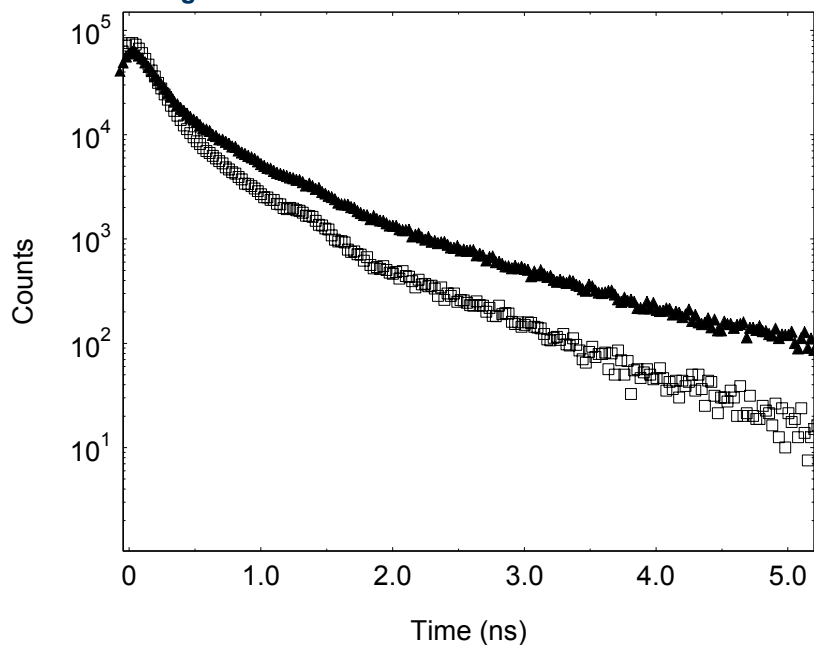

Filled triangles MEH-PPV, open squares MEH-PPV-PbS Composite.
